# Supplementary material
Source: Springer Nature journal article supplement (https://www.springermedizin.de/resource/supplementary/12981_2011_236_MOESM2_ESM.pdf/9604102)
Supplement: MOESM2 [file 9604102]

CD4 Nadir: 20

| Past Rx           | Mo | RNA Log Values  | Last CD4 |
|-------------------|----|-----------------|----------|
| AZT               | 19 |                 | 130      |
| AZT/DDI           | 6  |                 | 100      |
| DDC               | 21 |                 | 20       |
| 3TC/AZT           | 12 |                 | 20       |
| 3TC/AZT, IDV      | 19 | 4 4 4 3 4       | 181      |
| D4T, NVP, NFV     | 5  | 4 3 4 5         | 195      |
| D4T/DDI, NFV/SQV  | 14 | 4 4             | 144      |
| 3TC/ABC/D4T       | 32 | 2 2 3 4 4       | 209      |
| 3TC/TDF, LPVr/SQV | 23 | 4 2 0 0 3       | 317      |
| 3TC/TDF, ATVr     | 20 | 5 3 2 2 3 5 2 0 | 137      |

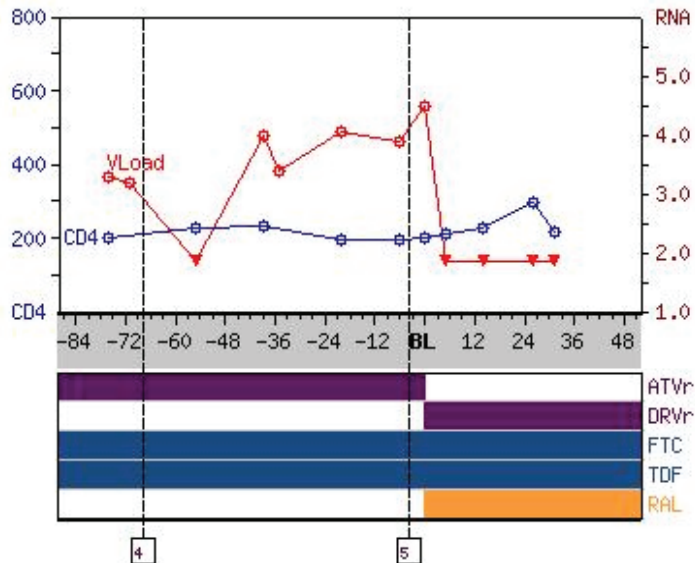

**Time-point Gene**

| Time-point | Gene | Mutations                                                                                                                                       |
|------------|------|-------------------------------------------------------------------------------------------------------------------------------------------------|
| 1          | PR   | 10I, 34Q, 43T, 54A, 63P, 71V, 82A, 92K                                                                                                          |
| 1          | RT   | 20R, 35T, 39A, 41L, 67N, 70R, 101E, 103KN, 122E, 166R, 181C, 207E, 215Y, 219Q                                                                   |
| 2          | PR   | 10I, 34Q, 43T, 54A, 63P, 71V, 82A, 92K                                                                                                          |
| 2          | RT   | 20R, 35T, 39A, 41L, 67N, 70R, 101E, 103KN, 122E, 166R, 181C, 207E, 215Y, 219Q, 228H                                                             |
| 3          | PR   | 63PS, 72IT                                                                                                                                      |
| 3          | RT   | 20R, 35T, 39A, 41L, 44ED, 60I, 67N, 70R, 101KE, 118VI, 122E, 166R, 181YC, 184V, 190A, 203EK, 207E, 208HY, 210SW, 215Y, 218DE, 219Q, 228H, 242QH |
| 4          | PR   | 10I, 24LI, 33LF, 34EQ, 43KT, 53FL, 54AV, 63P, 71V, 73S, 82AT, 92QK                                                                              |
| 4          | RT   | 20R, 21VI, 35T, 39A, 41L, 67DN, 70KR, 122E, 166R, 184V, 207E, 215Y, 241VI                                                                       |
| 5          | PR   | 10I, 13V, 33F, 34Q, 43T, 53L, 54A, 63P, 66F, 71V, 73S, 82A, 92K                                                                                 |
| 5          | RT   | 20R, 35T, 39A, 41L, 67N, 70S, 122E, 166R, 184V, 207E, 215Y                                                                                      |
